# Supplementary material
Source: MDPI journal article supplement (https://www.mdpi.com/2673-3501/2/3/17)
Supplement: s1 [file s1]

## Supporting Information

# Versatile Silver Nanoparticles-Based SERS Substrate with High Sensitivity and Stability

Mimi Liu <sup>1</sup>, Anjuli Bhandari<sup>2</sup>, Mujtaba Ali Haqqani Mohammed <sup>1</sup>, Daniela R. Radu<sup>1</sup>, Cheng-Yu Lai <sup>1,\*</sup>

<sup>1</sup> Department of Mechanical and Materials Engineering, Florida International University, Miami, FL 33199, USA; [mliu@fiu.edu](mailto:mliu@fiu.edu) (M.L.); [mmoha072@fiu.edu](mailto:mmoha072@fiu.edu) (M.A.H.M.); [dradu@fiu.edu](mailto:dradu@fiu.edu) (D.R.R.); [clai@fiu.edu](mailto:clai@fiu.edu) (C.-Y.L.)

<sup>2</sup> Oak Ridge Institute for Science and Education (Current affiliation), Oak Ridge, TN 37831, USA; [Anjuli@21robin.com](mailto:Anjuli@21robin.com) (A.B.)

\*Correspondence: [clai@fiu.edu](mailto:clai@fiu.edu)

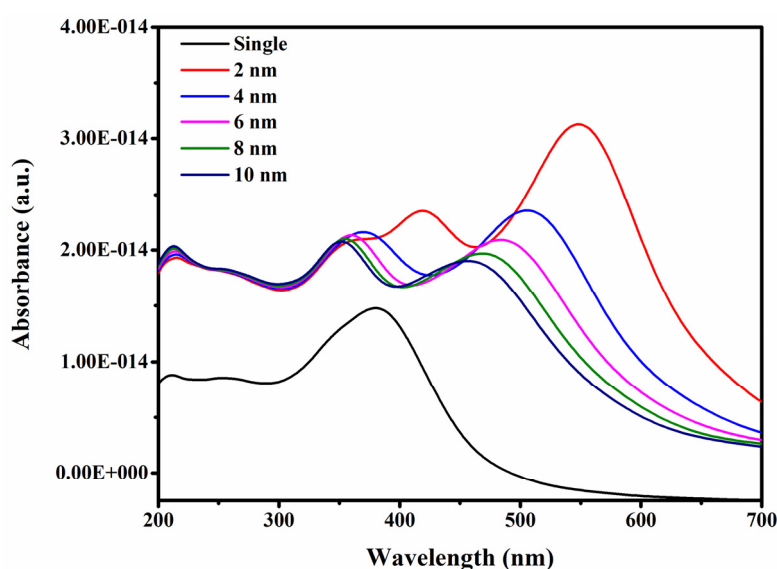

**Figure S 1.** (a) FDTD simulated absorption cross-sections of single Ag NP with radius of 45 nm and double Ag NPs with NP-NP-spacing of 2, 4, 6, 8, and 10 nm.

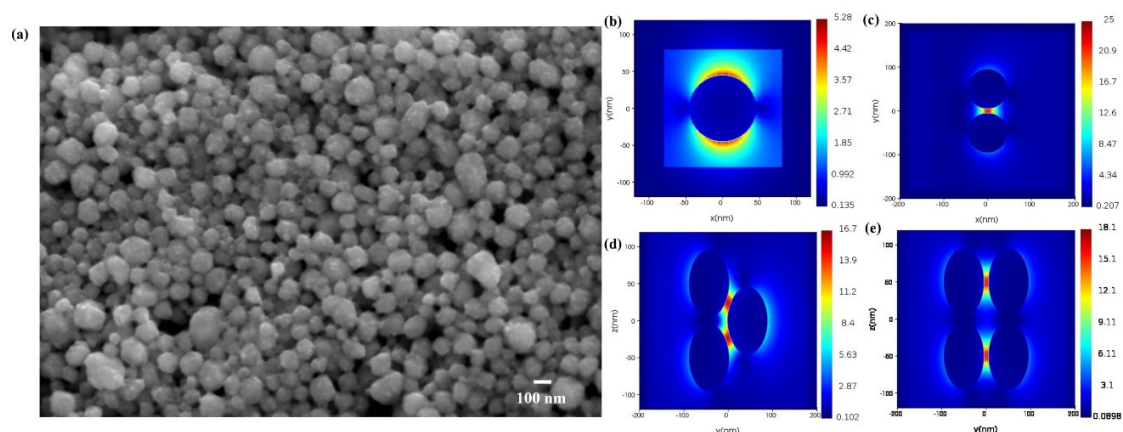

**Figure S 2.** (a) SEM image of Ag nanoparticles on PET-Print-based substrate. (b-e) FDTD simulated the electric field with the excitation wavelength of 532.6 nm for single Ag NP, 2 NPs, 3 NPs, and 4 NPs.

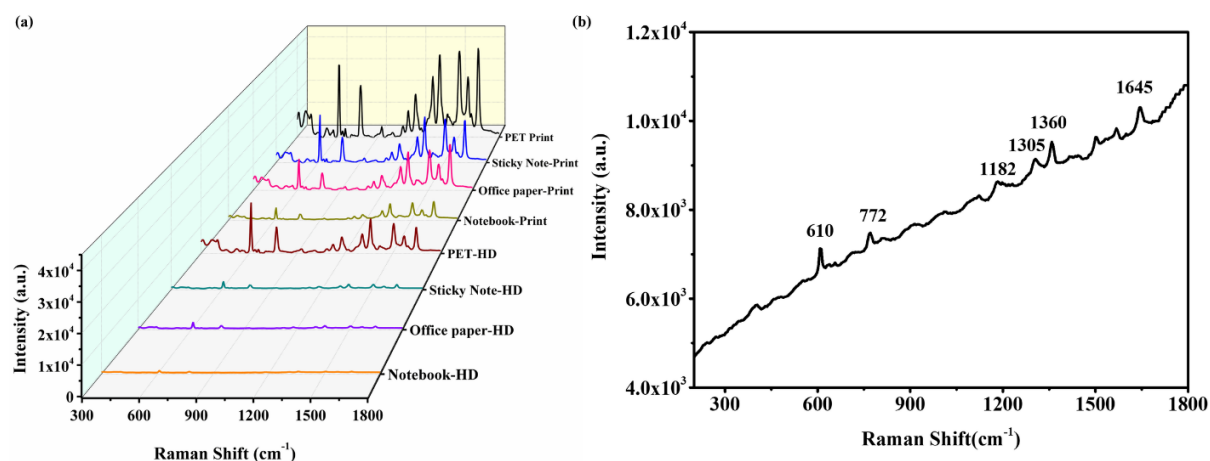

**Figure S 3.** (a) SERS spectra of 1  $\mu$ M R6G on different SERS substrates. (b) Raman spectrum of 0.1 M R6G on bare glass.

**Table S 1** Detection of R6G employing SERS-based approach.

| Analyte | Enhancing material  | Substrate                                                             | Fabrication Method                                           | Enhancement Factor | Reference          |
|---------|---------------------|-----------------------------------------------------------------------|--------------------------------------------------------------|--------------------|--------------------|
| R6G     | Mesoporous Ag NPs   | Glass slide                                                           | Sputter coating. Chemical reduction of oxidized silver films | $5 \times 10^5$    | Tastekova 2018 [1] |
| R6G     | Ag                  | PET sheet                                                             | Ion sputtering system                                        | $3 \times 10^6$    | Zuo 2016 [2]       |
| R6G     | Ag-MoS <sub>2</sub> | Si substrate                                                          | Spin-coating method                                          | $2.6 \times 10^6$  | Li 2018 [3]        |
| R6G     | Ag                  | Silicon wafer coated with polystyrene nanosphere                      | Thermal evaporation                                          | $5.1 \times 10^6$  | Zhang 2019 [4]     |
| R6G     | Ag                  | Metal liquid-like films (MeLLFs) with polyacrylamide hydrogels (PAAG) | Self-assembly                                                | $8 \times 10^6$    | Huo 2021 [5]       |

## References

- [1] E. A. Tastekova *et al.*, "Facile chemical routes to mesoporous silver substrates for SERS analysis," *Beilstein Journal of Nanotechnology*, vol. 9, pp. 880-889, 2018, doi: 10.3762/bjnano.9.82.
- [2] Z. Zuo, K. Zhu, C. Gu, Y. Wen, G. Cui, and J. Qu, "Transparent, flexible surface enhanced Raman scattering substrates based on Ag-coated structured PET (polyethylene terephthalate) for in-situ detection," *Applied Surface Science*, vol. 379, pp. 66-72, 2016/08/30/ 2016, doi: <https://doi.org/10.1016/j.apsusc.2016.04.022>.
- [3] J. Li, W. Zhang, H. Lei, and B. Li, "Ag nanowire/nanoparticle-decorated MoS<sub>2</sub> monolayers for surface-enhanced Raman scattering applications," *Nano Research*, vol. 11, no. 4, pp. 2181-2189, 2018/04/01 2018, doi: 10.1007/s12274-017-1836-4.
- [4] C. Zhang, T. You, N. Yang, Y. Gao, L. Jiang, and P. Yin, "Hydrophobic paper-based SERS platform for direct-droplet quantitative determination of melamine," *Food Chemistry*, vol. 287, pp. 363-368, 2019/07/30/ 2019, doi: <https://doi.org/10.1016/j.foodchem.2019.02.094>.
- [5] C. Huo, W. Han, W. Tang, and X. Duan, "Stable SERS substrate based on highly reflective metal liquid-like films wrapped hydrogels for direct determination of small molecules in a high protein matrix," *Talanta*, vol. 234, p. 122678, 2021/11/01/ 2021, doi: <https://doi.org/10.1016/j.talanta.2021.122678>.
